# Supplementary material for: Development of a Tailored Intervention With Computerized Clinical Decision Support to Improve Quality of Care for Patients With Knee Osteoarthritis: Multi-Method Study
Source: PubMed Central journal article supplement (PMC6018233; doi:10.2196/resprot.9927), 2018-06-11
Supplement: resprot_v7i6e154_app1.pdf [file resprot_v7i6e154_app1.pdf]

## Additional file 1

### Worksheet A. Prioritisation of recommendations for implementation

| Recommendations                                                                                                                                                                                     | Is this recommendation feasible for practice?                                                           | Are the consequences of not following this recommendation important?                                                                                                                                                          | Is there a large amount of inappropriate practice for this recommendation?                                                                                           | Is implementing this recommendation a priority?                                                                   |
|-----------------------------------------------------------------------------------------------------------------------------------------------------------------------------------------------------|---------------------------------------------------------------------------------------------------------|-------------------------------------------------------------------------------------------------------------------------------------------------------------------------------------------------------------------------------|----------------------------------------------------------------------------------------------------------------------------------------------------------------------|-------------------------------------------------------------------------------------------------------------------|
|                                                                                                                                                                                                     | <p>Consider:</p> <p>Presence of barriers or need for efforts to implement the recommended practice.</p> | <p>Consider:</p> <ul style="list-style-type: none"> <li>• Magnitude of intervention effect</li> <li>• Risks associated with the intervention</li> <li>• Level of evidence</li> <li>• Balance of benefits and cost.</li> </ul> | <p>Consider:</p> <ul style="list-style-type: none"> <li>• Evidence of underuse, misuse and/or overuse</li> <li>• Evidence of avoidable health inequities.</li> </ul> | <p>Consider:</p> <p>All the previous ratings to assess if implementation of the recommendation is a priority.</p> |
| <p>Scoring system: 1= Strongly disagree, 2= Disagree, 3= Disagree and agree equally, 4= Agree, 5= Strongly Agree, N= No opinion.<br/>Comments can be included in each cell following the score.</p> |                                                                                                         |                                                                                                                                                                                                                               |                                                                                                                                                                      |                                                                                                                   |
| 1.                                                                                                                                                                                                  |                                                                                                         |                                                                                                                                                                                                                               |                                                                                                                                                                      |                                                                                                                   |
| 2.                                                                                                                                                                                                  |                                                                                                         |                                                                                                                                                                                                                               |                                                                                                                                                                      |                                                                                                                   |
| 3.                                                                                                                                                                                                  |                                                                                                         |                                                                                                                                                                                                                               |                                                                                                                                                                      |                                                                                                                   |

Worksheet A is adapted from the worksheets developed in the Tailored Implementation for Chronic Diseases project (TICD).

## Worksheet B. Selection of an implementation strategy

| Determinant and recommendation(s) to which it applies                                                                                                                                       | Is this determinant likely to have an important impact?                                                           | What would be a potential implementation strategy?                                         | Is this strategy likely to have an important impact?                                                                     | Is this strategy feasible to implement?                                                     | Should the strategy be targeted?                                                         |
|---------------------------------------------------------------------------------------------------------------------------------------------------------------------------------------------|-------------------------------------------------------------------------------------------------------------------|--------------------------------------------------------------------------------------------|--------------------------------------------------------------------------------------------------------------------------|---------------------------------------------------------------------------------------------|------------------------------------------------------------------------------------------|
| Consider:<br><br>Information from brainstorming, literature reviews, surveys, interviews, focus groups, routinely collected data, observation.*                                             | Consider:<br><br>The importance of the determinant for adherence to the recommendations for the targeted problem. | Consider:<br><br>There may be more than one potential implementation strategy per barrier. | Consider:<br><br>The likely effectiveness of the implementation strategy in relation to the prioritised recommendations. | Consider:<br><br>The availability of the required human, technical and financial resources. | Consider:<br><br>All the previous ratings to assess if this strategy should be targeted. |
| Scoring system: 1= Strongly disagree, 2= Disagree, 3= Disagree and agree equally, 4= Agree, 5= Strongly Agree, N= No opinion.<br>Comments can be included in each cell following the score. |                                                                                                                   |                                                                                            |                                                                                                                          |                                                                                             |                                                                                          |
| 1.                                                                                                                                                                                          |                                                                                                                   |                                                                                            |                                                                                                                          |                                                                                             |                                                                                          |
| 2.                                                                                                                                                                                          |                                                                                                                   |                                                                                            |                                                                                                                          |                                                                                             |                                                                                          |
| 3.                                                                                                                                                                                          |                                                                                                                   |                                                                                            |                                                                                                                          |                                                                                             |                                                                                          |

\* Consult the TICD checklist for a comprehensive overview of potential determinants.

Worksheet B is adapted from the worksheets developed in the Tailored Implementation for Chronic Diseases project (TICD).

## Worksheet C. Appropriateness of CDS advice for specific recommendations

| Suggested CDS advice and recommendation(s) to which it applies                                                                                                                                      | Which structured patient data are required for CDS?                                   | Is appropriate operationalisation with CDS likely?                                                                                                                                                                                                                                       | Is appropriate user response likely?                                                                                                                                                                                                                                         | Is this CDS advice appropriate?                                                                         |
|-----------------------------------------------------------------------------------------------------------------------------------------------------------------------------------------------------|---------------------------------------------------------------------------------------|------------------------------------------------------------------------------------------------------------------------------------------------------------------------------------------------------------------------------------------------------------------------------------------|------------------------------------------------------------------------------------------------------------------------------------------------------------------------------------------------------------------------------------------------------------------------------|---------------------------------------------------------------------------------------------------------|
| <p>Consider:</p> <p>What, for whom, when, where and how?</p>                                                                                                                                        | <p>Consider:</p> <p>Cases in which the support should or should not be triggered.</p> | <p>Consider:</p> <ul style="list-style-type: none"> <li>• If the condition and recommended action are defined in sufficient detail to be operationalised</li> <li>• Completeness, accuracy and specificity of available patient data</li> <li>• Likelihood of inaccurate CDS.</li> </ul> | <p>Consider:</p> <ul style="list-style-type: none"> <li>• Evidence on the effect of CDS for the clinical setting, clinical task, type of outcome</li> <li>• Rates of ignoring or overriding CDS for similar objectives</li> <li>• Risks of errors because of CDS.</li> </ul> | <p>Consider:</p> <p>All the previous ratings to assess if this suggested CDS advice is appropriate.</p> |
| <p>Scoring system: 1= Strongly disagree, 2= Disagree, 3= Disagree and agree equally, 4= Agree, 5= Strongly Agree, N= No opinion.<br/>Comments can be included in each cell following the score.</p> |                                                                                       |                                                                                                                                                                                                                                                                                          |                                                                                                                                                                                                                                                                              |                                                                                                         |
| 1.                                                                                                                                                                                                  |                                                                                       |                                                                                                                                                                                                                                                                                          |                                                                                                                                                                                                                                                                              |                                                                                                         |
| 2.                                                                                                                                                                                                  |                                                                                       |                                                                                                                                                                                                                                                                                          |                                                                                                                                                                                                                                                                              |                                                                                                         |
| 3.                                                                                                                                                                                                  |                                                                                       |                                                                                                                                                                                                                                                                                          |                                                                                                                                                                                                                                                                              |                                                                                                         |
