# Supplementary material for: Development of a Tailored Intervention With Computerized Clinical Decision Support to Improve Quality of Care for Patients With Knee Osteoarthritis: Multi-Method Study
Source: PubMed Central journal article supplement (PMC6018233; doi:10.2196/resprot.9927), 2018-06-11
Supplement: resprot_v7i6e154_app4.pdf [file resprot_v7i6e154_app4.pdf]

## Additional file 4

### Prioritisation of knee osteoarthritis recommendations

| Recommendations                                                                                                                                                                                                               | Summary of scores<br>(for the overall<br>assessment of the<br>raters in Norway,<br>Belgium and<br>Finland) | Comments                                                                                                                                  |
|-------------------------------------------------------------------------------------------------------------------------------------------------------------------------------------------------------------------------------|------------------------------------------------------------------------------------------------------------|-------------------------------------------------------------------------------------------------------------------------------------------|
| <b>DIAGNOSIS</b>                                                                                                                                                                                                              |                                                                                                            |                                                                                                                                           |
| Diagnose knee OA clinically without investigations if a person is 45 or over and has activity-related joint pain and has either no morning joint-related stiffness or morning stiffness that lasts no longer than 30 minutes. | Median 4, IQR 4-5,<br>Range 2-5                                                                            | Selected. The Finnish experts did not prioritise this recommendation.                                                                     |
| Radiography should not routinely be used to diagnose knee OA                                                                                                                                                                  | Median 4, IQR 2.5-5,<br>Range 1-5                                                                          |                                                                                                                                           |
| Laboratory test should not routinely be used to diagnose knee OA                                                                                                                                                              | Median 3.5, IQR 3-4,<br>Range 3-4                                                                          |                                                                                                                                           |
| MRI should not be used standardly for diagnosing knee OA                                                                                                                                                                      | Median 4, IQR 4-4.5,<br>Range 3-5                                                                          | We did not select this recommendation, since it is a logical consequence of the selected recommendation on diagnosing knee OA clinically. |
| <b>NON-PHARMACOLOGICAL MANAGEMENT</b>                                                                                                                                                                                         |                                                                                                            |                                                                                                                                           |
| <b>Patients with knee OA should be educated and receive self-management information or be referred to self-management programmes</b>                                                                                          | Median 5, IQR 4.5-5,<br>Range 4-5                                                                          | Selected                                                                                                                                  |
| Patients with knee OA should be instructed in the use of thermal modalities                                                                                                                                                   | Median 1.5, IQR 1-2,<br>Range 1-4                                                                          |                                                                                                                                           |
| Patients with knee OA who are overweight, should be advised to lose weight                                                                                                                                                    | Median 5, IQR 4-5,<br>Range 4-5                                                                            | Selected                                                                                                                                  |
| Patients with knee OA should be advised to engage in low-impact aerobic exercise (land or water based)                                                                                                                        | Median 4, IQR 4-5,<br>Range 4-5                                                                            | Selected                                                                                                                                  |

|                                                                                                                                                                    |                                |                                                                               |
|--------------------------------------------------------------------------------------------------------------------------------------------------------------------|--------------------------------|-------------------------------------------------------------------------------|
| Patients with knee OA should be advised to participate in endurance and/or strengthening exercises                                                                 | Median 5, IQR 4-5, Range 3-5   | Selected                                                                      |
| Patients with knee OA should exercise supervised by a physical therapist with manual therapy                                                                       | Median 3.5, IQR 3-4, Range 2-5 |                                                                               |
| Patients with knee OA should receive walking aids as needed                                                                                                        | Median 3, IQR 2.5-3, Range 2-4 |                                                                               |
| Patients with knee OA should be advised to wear appropriate footwear/insoles                                                                                       | Median 3, IQR 3-3.5, Range 2-4 |                                                                               |
| <b>PHARMACOLOGICAL MANAGEMENT</b>                                                                                                                                  |                                |                                                                               |
| Acetaminophen paracetamol (<4 g/day) should be used as an initial analgesic                                                                                        | Median 2.5, IQR 2-4, Range 2-5 |                                                                               |
| Oral NSAID should be used after acetaminophen                                                                                                                      | Median 4, IQR 4-4, Range 3-5   | Selected                                                                      |
| Topical NSAID should be used as adjunctive and alternative                                                                                                         | Median 4, IQR 4-4.5, Range 3-5 | Selected                                                                      |
| Topical capsaicin should be used as adjunct and alternative                                                                                                        | Median 2, IQR 1-2, Range 1-3   | Topical capsaicin is not available to knee osteoarthritis patients in Finland |
| Gastroprotection is needed for high-risk patients                                                                                                                  | Median 4, IQR 3.5-4, Range 3-5 | Selected                                                                      |
| Use of Tramadol for refractory symptoms                                                                                                                            | Median 3, IQR 2-3, Range 2-3   |                                                                               |
| Opioids should be used for cases refractory to other modalities                                                                                                    | Median 3, IQR 2.5-4, Range 2-4 |                                                                               |
| Intraarticular injections with corticosteroids should be used in the treatment of knee OA in patients with effusions or other physical signs of local inflammation | Median 3, IQR 3-3.5, Range 2-4 |                                                                               |
| <b>SURGERY</b>                                                                                                                                                     |                                |                                                                               |
| Joint replacement is recommended for appropriate patients with knee OA                                                                                             | Median 4, IQR 3-4.5, Range     |                                                                               |
| Arthroscopy with debridement is not recommended for the management of                                                                                              | Median 4, IQR 4-5, Range 4-5   | Selected                                                                      |

symptomatic knee OA.
