# Supplementary material for: Development of a Tailored Intervention With Computerized Clinical Decision Support to Improve Quality of Care for Patients With Knee Osteoarthritis: Multi-Method Study
Source: PubMed Central journal article supplement (PMC6018233; doi:10.2196/resprot.9927), 2018-06-11
Supplement: resprot_v7i6e154_app5.pdf [file resprot_v7i6e154_app5.pdf]

## Additional file 5 - Focus group data

| Country | Group     | Identified by patient or GP | Determinant from interviews                                                                                                     | Prioritised | Suggested heading for determinant                       | Checklist domain | Unique to participant profile | Unique factor to country |
|---------|-----------|-----------------------------|---------------------------------------------------------------------------------------------------------------------------------|-------------|---------------------------------------------------------|------------------|-------------------------------|--------------------------|
| Belgium | Leuven 1  | Patient                     | CDS is acceptable for patients                                                                                                  | No          | Acceptability of CDS for patients                       | CDS Context      | Patients                      | Three countries          |
| Belgium | Leuven 1  | Patient                     | Decision support is a good alternative for the time limitations of a consultation                                               | No          | Acceptability of CDS for patients                       | CDS Context      | Patients                      | Three countries          |
| Norway  | Oslo 1    | Patient                     | There is variation in attitudes about CDS depending on previous experiences with technology                                     | No          | Acceptability of CDS for patients                       | CDS Context      | Patients                      | Three countries          |
| Finland | Tampere 1 | Patient                     | Not everybody (physicians and/or patients) will use or accept CDS that is directed at patients                                  | No          | Acceptability of CDS for patients                       | CDS Context      | Patients                      | Three countries          |
| Finland | Tampere 2 | Patient                     | Healthcare professionals and patients will accept the CDS system                                                                | No          | Acceptability of CDS for patients                       | CDS Context      | Patients                      | Three countries          |
| Belgium | Leuven 2  | GP                          | The system should not limit the physician in his/her treatment choices                                                          | No          | Acceptability of CDS for physicians                     | CDS Context      | GPs                           | Two countries            |
| Belgium | Leuven 2  | GP                          | The system should inform and alert but not criticise the physician                                                              | No          | Acceptability of CDS for physicians                     | CDS Context      | GPs                           | Two countries            |
| Belgium | Leuven 2  | GP                          | Decision support should be constructive                                                                                         | No          | Acceptability of CDS for physicians                     | CDS Context      | GPs                           | Two countries            |
| Norway  | Oslo 1    | GP                          | The attitudes toward CDS depend on how CDS is implemented because it might be disturbing                                        | No          | Acceptability of CDS for physicians                     | CDS Context      | GPs                           | Two countries            |
| Belgium | Leuven 2  | GP                          | There are data gaps in the patient's medical record                                                                             | No          | Accuracy and completeness of the available patient data | CDS Context      | Mixed                         | Three countries          |
| Belgium | Leuven 1  | GP                          | The patient's medical record needs to be of good quality                                                                        | Yes         | Accuracy and completeness of the available patient data | CDS Context      | Mixed                         | Three countries          |
| Norway  | Oslo 1    | GP                          | The quality of the patient data is good enough for CDS on knee osteoarthritis, often symptoms are recorded instead of diagnosis | No          | Accuracy and completeness of the available patient data | CDS Context      | Mixed                         | Three countries          |
| Norway  | Oslo 2    | GP                          | Quality of patient data can vary from one electronic record to another                                                          | No          | Accuracy and completeness of the available patient data | CDS context      | Mixed                         | Three countries          |
| Norway  | Oslo 2    | GP                          | Data about diagnosis, medication, age, blood pressure can be used by CDS                                                        | No          | Accuracy and completeness of the available patient data | CDS context      | Mixed                         | Three countries          |

|         |           |         |                                                                                                                                             |     |                                                         |             |       |                 |
|---------|-----------|---------|---------------------------------------------------------------------------------------------------------------------------------------------|-----|---------------------------------------------------------|-------------|-------|-----------------|
| Finland | Tampere 2 | Patient | Patient records need to be updated and patients need to have confidence that the data is reliable                                           | yes | Accuracy and completeness of the available patient data | CDS context | Mixed | Three countries |
| Belgium | Leuven 2  | GP      | CDS should not overload the clinician, the information could also be provided in a dosed way over time                                      | No  | Amount of decision support for healthcare professionals | CDS Content | GPs   | Two countries   |
| Norway  | Oslo 1    | GP      | CDS can become too much when a patient has multimorbidities, the content should be prioritised                                              | No  | Amount of decision support for healthcare professionals | CDS content | GPs   | Two countries   |
| Norway  | Oslo 2    | GP      | When the information becomes too much, then you loose focus                                                                                 | Yes | Amount of decision support for healthcare professionals | CDS content | GPs   | Two countries   |
| Belgium | Leuven 2  | GP      | CDS should not overload the patient, too much information will lead to forgetting parts of it                                               | Yes | Amount of decision support for patients                 | CDS Content | Mixed | Two countries   |
| Belgium | Leuven 2  | GP      | Information for the patient should be dosed over time                                                                                       | No  | Amount of decision support for patients                 | CDS Content | Mixed | Two countries   |
| Belgium | Leuven 1  | GP      | If CDS provides information about every problem a patient has, than that can be too much for the patient and might lead to unhappy patients | No  | Amount of decision support for patients                 | CDS Content | Mixed | Two countries   |
| Finland | Tampere 2 | Patient | Amount of advice is kept under control                                                                                                      | Yes | Amount of decision support for patients                 | CDS content | Mixed | Two countries   |
| Norway  | Oslo 1    | GP      | Decision support should be specific on which type of training                                                                               | No  | Appropriate call to action                              | CDS content | Mixed | Two countries   |
| Norway  | Oslo 2    | Patient | It is important that CDS is concrete. For example which types of training work best?                                                        | Yes | Appropriate call to action                              | CDS content | Mixed | Two countries   |
| Finland | Tampere 1 | Patient | The information should contain precise advice on what type of exercise/medication a patient needs                                           | Yes | Appropriate call to action                              | CDS content | Mixed | Two countries   |
| Finland | Tampere 1 | Patient | Patients are informed about different treatment options and have the opportunity to receive specific treatments                             | Yes | Appropriate call to action                              | CDS content | Mixed | Two countries   |
| Finland | Tampere 1 | Patient | Advice is understandable and easy to use                                                                                                    | Yes | Appropriate call to action                              | CDS content | Mixed | Two countries   |
| Finland | Tampere 2 | Patient | Advice is reliable and understandable and always activated                                                                                  | Yes | Appropriate call to action                              | CDS content | Mixed | Two countries   |
| Finland | Tampere 2 | Patient | It is possible to use/do what CDS recommends                                                                                                | Yes | Appropriate call to action                              | CDS content | Mixed | Two countries   |

|         |           |           |                                                                                                                                                      |     |                                                         |                    |       |                 |
|---------|-----------|-----------|------------------------------------------------------------------------------------------------------------------------------------------------------|-----|---------------------------------------------------------|--------------------|-------|-----------------|
| Belgium | Leuven 1  | GP        | CDS helps the physician to be vigilant and not to forget certain treatment options                                                                   | Yes | Benefits on health professional awareness and vigilance | CDS Context        | Mixed | Two countries   |
| Norway  | Oslo 1    | GP        | It would be interesting for the physician to receive information on which patients are coping bad with their disease                                 | Yes | Benefits on health professional awareness and vigilance | CDS Context        | Mixed | Two countries   |
| Norway  | Oslo 2    | Patient   | Maybe clinicians will be more attentive to osteoarthritis with this strategy                                                                         | Yes | Benefits on health professional awareness and vigilance | CDS context        | Mixed | Two countries   |
| Belgium | Leuven 2  | GP        | It is very positive that such a system can identify and fill gaps in the patient's medical record                                                    | Yes | Benefits on quality of patient data                     | CDS Context        | Mixed | Three countries |
| Norway  | Oslo 2    | GP        | Use of CDS can potentially motivate physicians to define diagnosis more specific instead of registering symptoms only                                | No  | Benefits on quality of patient data                     | CDS context        | Mixed | Three countries |
| Finland | Tampere 1 | Patient   | Necessary information has to be recorded in the patient record and it is positive that CDS stimulates good quality of patient record data (e.g. BMI) | Yes | Benefits on quality of patient data                     | CDS context        | Mixed | Three countries |
| Belgium | Leuven 2  | GP        | CDS that is targeted directly at the patient can reduce the time before a new consultation is planned                                                | Yes | Benefits on timely care                                 | CDS context        | GPs   | One country     |
| Belgium | Leuven 2  | GP        | Sufficient financial support for the CDS intervention is required                                                                                    | No  | Budget for the CDS implementation                       | CDS Implementation | GPs   | One country     |
| Norway  | Oslo 1    | GP        | Is the CDS information relevant?                                                                                                                     | No  | Clinical appropriateness                                | CDS content        | GPs   | One country     |
| Norway  | Oslo 1    | GP        | How many of the decision support messages are irrelevant?                                                                                            | No  | Clinical appropriateness                                | CDS content        | GPs   | One country     |
| Norway  | Oslo 2    | GP        | It is important that decision support provides nuances that are specific to a patient and that can be too big of a challenge for some problems       | Yes | Clinical appropriateness                                | CDS content        | GPs   | One country     |
| Norway  | Oslo 2    | GP        | Which decision support is triggered when a patient has multiple diagnoses?                                                                           | No  | Clinical appropriateness                                | CDS content        | GPs   | One country     |
| Belgium | Leuven 1  | Not clear | Collect patient feedback about CDS through the physicians                                                                                            | No  | Collection of user feedback                             | CDS Implementation | GPs   | Two countries   |

|         |          |         |                                                                                                                                                                                         |           |                                               |                    |       |                 |
|---------|----------|---------|-----------------------------------------------------------------------------------------------------------------------------------------------------------------------------------------|-----------|-----------------------------------------------|--------------------|-------|-----------------|
| Norway  | Oslo 2   | GP      | Monitoring is important for those that manage the project in order to improve the strategy                                                                                              | Yes       | Collection of user feedback                   | CDS Implementation | GPs   | Two countries   |
| Norway  | Oslo 2   | GP      | Other electronic initiatives provide the opportunity for users to provide feedback, this channel is being used and their are persons that are responsible to follow up on this feedback | No        | Collection of user feedback                   | CDS Implementation | GPs   | Two countries   |
| Belgium | Leuven 2 | GP      | CDS should be short and understandable in an eyeblink                                                                                                                                   | Yes       | Concise information                           | CDS System         | GPs   | Two countries   |
| Belgium | Leuven 2 | GP      | CDS should be available in a short text that is to the point. It should be possible to click the decision support when further information is desired.                                  | Yes       | Concise information                           | CDS System         | GPs   | Two countries   |
| Norway  | Oslo 2   | GP      | CDS content should be short with a limited number of expandable layers that provide additional information                                                                              | No        | Concise information                           | CDS system         | GPs   | Two countries   |
| Belgium | Leuven 1 | Patient | Physicians need to devote sufficient time to the patient during consultations in general                                                                                                | Yes       | Contact between the physician and the patient | CDS Context        | Mixed | Two countries   |
| Norway  | Oslo 1   | GP      | CDS can disturb the contact between the physician and the patient                                                                                                                       | No        | Contact between the physician and the patient | CDS context        | Mixed | Two countries   |
| Norway  | Oslo 2   | GP      | CDS can disturb the contact between the physician and the patient                                                                                                                       | Yes       | Contact between the physician and the patient | CDS context        | Mixed | Two countries   |
| Belgium | Leuven 2 | GP      | The clinician should have control over the system                                                                                                                                       | No        | Control over the system                       | CDS System         | GPs   | Two countries   |
| Belgium | Leuven 1 | GP      | CDS should be customisable                                                                                                                                                              | Not clear | Control over the system                       | CDS System         | GPs   | Two countries   |
| Norway  | Oslo 1   | GP      | The clinician should have control over the system                                                                                                                                       | No        | Control over the system                       | CDS system         | GPs   | Two countries   |
| Norway  | Oslo 2   | GP      | The physician should have control over the system                                                                                                                                       | Yes       | Control over the system                       | CDS system         | GPs   | Two countries   |
| Belgium | Leuven 2 | GP      | The source of the decision support should be reliable and based on guidelines                                                                                                           | Yes       | Credibility of the information                | CDS Content        | Mixed | Three countries |
| Belgium | Leuven 1 | Patient | Patient information is not always reliable                                                                                                                                              | No        | Credibility of the information                | CDS Content        | Mixed | Three countries |
| Norway  | Oslo 1   | Patient | It is difficult to know how credible information is as a patient, and the patient trusts the clinician                                                                                  | No        | Credibility of the information                | CDS content        | Mixed | Three countries |

|         |           |         |                                                                                                                                                                                                                                                                                           |           |                                                                                           |             |          |                 |
|---------|-----------|---------|-------------------------------------------------------------------------------------------------------------------------------------------------------------------------------------------------------------------------------------------------------------------------------------------|-----------|-------------------------------------------------------------------------------------------|-------------|----------|-----------------|
| Norway  | Oslo 1    | GP      | The information should be evidence-based                                                                                                                                                                                                                                                  | No        | Credibility of the information                                                            | CDS content | Mixed    | Three countries |
| Norway  | Oslo 1    | GP      | The level of evidence for each recommendation should be clear                                                                                                                                                                                                                             | No        | Credibility of the information                                                            | CDS content | Mixed    | Three countries |
| Norway  | Oslo 1    | GP      | It is not always easy to know if information is evidence-based, this should be clear                                                                                                                                                                                                      | Yes       | Credibility of the information                                                            | CDS content | Mixed    | Three countries |
| Finland | Tampere 1 | Patient | The information is evidence-based                                                                                                                                                                                                                                                         | Yes       | Credibility of the information                                                            | CDS content | Mixed    | Three countries |
| Norway  | Oslo 1    | Patient | Patients do not have access in the EMR. Can the future electronic patient record be an instrument to provide decision support to patients?                                                                                                                                                | Not clear | Delivery channel of decision support for patients                                         | CDS system  | Patients | Two countries   |
| Finland | Tampere 1 | Patient | Decision support should appear in all the communication channels that a patient uses                                                                                                                                                                                                      | Yes       | Delivery channel of decision support                                                      | CDS system  | Patients | Two countries   |
| Finland | Tampere 2 | Patient | The system needs a continuous developing process                                                                                                                                                                                                                                          | Yes       | Delivery channel of decision support                                                      | CDS system  | Patients | Two countries   |
| Belgium | Leuven 2  | Patient | Patients want to receive information through their clinician                                                                                                                                                                                                                              | Yes       | Delivery of decision support for patients with healthcare professional as an intermediate | CDS System  | Mixed    | Two countries   |
| Belgium | Leuven 1  | Patient | Decision support for patients should be delivered through the physician                                                                                                                                                                                                                   | No        | Delivery of decision support for patients with healthcare professional as an intermediate | CDS System  | Mixed    | Two countries   |
| Belgium | Leuven 1  | Patient | Some patients want to receive information directly from the system                                                                                                                                                                                                                        | Yes       | Delivery of decision support for patients with healthcare professional as an intermediate | CDS System  | Mixed    | Two countries   |
| Norway  | Oslo 2    | GP      | CDS that sends information directly to patients can be unacceptable for some patients and physicians. An alternative approach is that the physician first gets an overview of CDS for the patient and then decides if this is relevant to provide to the patient as an electronic notice. | No        | Delivery of decision support for patients with healthcare professional as an intermediate | CDS System  | Mixed    | Two countries   |
| Belgium | Leuven 2  | GP      | The decision support should inform about the effect that can be expected                                                                                                                                                                                                                  | No        | Details about benefits and harms                                                          | CDS Content | Mixed    | Two countries   |

|         |           |         |                                                                                                                                                              |     |                                                             |             |       |                 |
|---------|-----------|---------|--------------------------------------------------------------------------------------------------------------------------------------------------------------|-----|-------------------------------------------------------------|-------------|-------|-----------------|
| Belgium | Leuven 1  | GP      | Decision support information about effects are trivial facts                                                                                                 | No  | Details about benefits and harms                            | CDS Content | Mixed | Two countries   |
| Norway  | Oslo 1    | Patient | The outcomes of treatment choices should be clear for patients, also the outcomes of not doing something should be clear                                     | No  | Details about benefits and harms                            | CDS content | Mixed | Two countries   |
| Norway  | Oslo 2    | GP      | The way that you present the decision support and effect estimates is very important                                                                         | Yes | Details about benefits and harms                            | CDS Content | Mixed | Two countries   |
| Norway  | Oslo 2    | GP      | Quick access to hard facts with very precise effect estimate information is needed                                                                           | No  | Details about benefits and harms                            | CDS Content | Mixed | Two countries   |
| Belgium | Leuven 2  | Patient | The effect of treatment options can differ from patient to patient                                                                                           | Yes | Differential treatment effects across subgroups of patients | CDS Content | Mixed | One country     |
| Belgium | Leuven 1  | GP      | Patients are different and some treatment options might not be relevant for specific patients                                                                | Yes | Differential treatment effects across subgroups of patients | CDS Content | Mixed | One country     |
| Belgium | Leuven 1  | GP      | Within the EHR, physicians already need to click a lot. CDS requires additional clicks and I don't know if I am motivated to do make that additional effort. | No  | Effort required to use the system                           | CDS System  | Mixed | Three countries |
| Norway  | Oslo 2    | GP      | Experience with the system will reduce the time that is required to use it                                                                                   | Yes | Effort required to use the system                           | CDS system  | Mixed | Three countries |
| Norway  | Oslo 2    | GP      | Navigation in the CDS system should be easy                                                                                                                  | No  | Effort required to use the system                           | CDS system  | Mixed | Three countries |
| Finland | Tampere 1 | Patient | The system is easy to use                                                                                                                                    | Yes | Effort required to use the system                           | CDS system  | Mixed | Three countries |
| Finland | Tampere 2 | Patient | Easy to use for both professionals and patients                                                                                                              | Yes | Effort required to use the system                           | CDS system  | Mixed | Three countries |
| Finland | Tampere 2 | Patient | Advice is available easily                                                                                                                                   | No  | Effort required to use the system                           | CDS system  | Mixed | Three countries |
| Norway  | Oslo 2    | GP      | CDS can connect data and information that is available                                                                                                       | No  | General                                                     | CDS context | /     | /               |
| Finland | Tampere 1 | Patient | CDS has the potential to improve quality of care                                                                                                             | Yes | General                                                     | CDS context | /     | /               |
| Finland | Tampere 2 | Patient | CDS can improve the quality of care in healthcare services                                                                                                   | Yes | General                                                     | CDS context | /     | /               |
| Finland | Tampere 2 | Patient | A system produces advice to the right persons                                                                                                                | Yes | General                                                     | CDS system  | /     | /               |

|         |           |         |                                                                                                                                  |           |                                                    |                    |       |               |
|---------|-----------|---------|----------------------------------------------------------------------------------------------------------------------------------|-----------|----------------------------------------------------|--------------------|-------|---------------|
| Norway  | Oslo 2    | GP      | The system should be perfect when it is launched                                                                                 | No        | General                                            | CDS Implementation | /     | /             |
| Finland | Tampere 1 | Patient | The implementation needs good management                                                                                         | Yes       | General                                            | CDS implementation | /     | /             |
| Finland | Tampere 2 | Patient | Implementation is managed and system use is monitored                                                                            | Yes       | General                                            | CDS implementation | /     | /             |
| Belgium | Leuven 2  | GP      | CDS should be available without costs for the patient                                                                            | No        | Impact of CDS on treatment costs                   | CDS Context        | Mixed | One country   |
| Belgium | Leuven 2  | Patient | Patients accept to pay more for a visit if that leads to higher quality treatment                                                | No        | Impact of CDS on treatment costs                   | CDS Context        | Mixed | One country   |
| Finland | Tampere 1 | Patient | The way the CDS is developed is important, especially the feasibility to use it on a daily practice for patients and physicians  | Yes       | Impact on the workload                             | CDS Context        | Mixed | Two countries |
| Belgium | Leuven 2  | GP      | Decision support should fit in the workflow so that it has no negative impact on the amount of patients seen by the clinician    | Yes       | Impact on the workload of healthcare professionals | CDS Context        | Mixed | Two countries |
| Belgium | Leuven 2  | GP      | The clinician is time pressured during consultations and decision support create stress for the physician                        | No        | Impact on the workload of healthcare professionals | CDS Context        | Mixed | Two countries |
| Belgium | Leuven 2  | GP      | Time is limited during a consultation and it may be necessary to plan an additional consultation to discuss the decision support | Yes       | Impact on the workload of healthcare professionals | CDS Context        | Mixed | Two countries |
| Belgium | Leuven 2  | GP      | CDS can save time for the clinician when searching for information                                                               | Yes       | Impact on the workload of healthcare professionals | CDS Context        | Mixed | Two countries |
| Belgium | Leuven 1  | GP      | Time during a consultation is too short when a patient comes for multiple problems                                               | Yes       | Impact on the workload of healthcare professionals | CDS Context        | Mixed | Two countries |
| Belgium | Leuven 1  | GP      | Physicians lack time                                                                                                             | No        | Impact on the workload of healthcare professionals | CDS context        | Mixed | Two countries |
| Belgium | Leuven 1  | GP      | Decision support information can compete with other information sources                                                          | Not clear | Impact on use of other systems                     | CDS Context        | GPs   | One country   |
| Norway  | Oslo 2    | Patient | Governance should be public                                                                                                      | Yes       | Independence and conflicts of interest             | CDS Implementation | Mixed | One country   |

|         |           |         |                                                                                                                                                                         |     |                                                    |                    |          |                 |
|---------|-----------|---------|-------------------------------------------------------------------------------------------------------------------------------------------------------------------------|-----|----------------------------------------------------|--------------------|----------|-----------------|
| Norway  | Oslo 2    | GP      | Governance can be private, but not financed by drug industry                                                                                                            | No  | Independence and conflicts of interest             | CDS Implementation | Mixed    | One country     |
| Finland | Tampere 1 | Patient | Patients and physicians need Information about the system beforehand                                                                                                    | Yes | Information about CDS                              | CDS implementation | Mixed    | Two countries   |
| Finland | Tampere 2 | Patient | Appropriate information about the system is given to users                                                                                                              | No  | Information about CDS                              | CDS implementation | Mixed    | Two countries   |
| Belgium | Leuven 2  | GP      | The mode of information to users about the CDS system can be diverse                                                                                                    | No  | Information about CDS for healthcare professionals | CDS Implementation | Mixed    | Two countries   |
| Belgium | Leuven 1  | GP      | Regular updates are needed that communicate new content                                                                                                                 | No  | Information about CDS for healthcare professionals | CDS Implementation | Mixed    | Two countries   |
| Norway  | Oslo 2    | Patient | When information is sent automatically to patients, then it should be clear for the patient why he/she receives this information                                        | No  | Information about CDS for patients                 | CDS Implementation | Patients | Two countries   |
| Belgium | Leuven 2  | GP      | Possibility to address knowledge gaps for a physician                                                                                                                   | Yes | Information needs for healthcare                   | CDS Context        | Mixed    | Three countries |
| Belgium | Leuven 2  | GP      | Useful to remain up to date as a physician                                                                                                                              | No  | Information needs for healthcare                   | CDS Context        | Mixed    | Three countries |
| Belgium | Leuven 1  | GP      | Decision support is not needed if you know the guideline                                                                                                                | No  | Information needs for healthcare                   | CDS Context        | Mixed    | Three countries |
| Belgium | Leuven 1  | GP      | It is important to have information about new recommendations                                                                                                           | No  | Information needs for healthcare                   | CDS Context        | Mixed    | Three countries |
| Norway  | Oslo 1    | GP      | It would be interesting to know how many persons with knee symptoms get osteoarthritis                                                                                  | Yes | Information needs for healthcare                   | CDS Context        | Mixed    | Three countries |
| Norway  | Oslo 2    | GP      | It is not sufficient to disseminate guideline information only on the internet                                                                                          | No  | Information needs for healthcare professionals     | CDS context        | Mixed    | Three countries |
| Finland | Tampere 1 | Patient | It is necessary that CDS advice becomes integrated in every healthcare setting (Occupational health care, Physiotherapy, etc) and not only for the general practitioner | Yes | Information needs for healthcare                   | CDS context        | Mixed    | Three countries |



|         |           |         |                                                                                                                                                        |     |                                                              |                    |                 |               |
|---------|-----------|---------|--------------------------------------------------------------------------------------------------------------------------------------------------------|-----|--------------------------------------------------------------|--------------------|-----------------|---------------|
| Finland | Tampere 1 | Patient | It is necessary that CDS helps the healthcare professional to choose the right medicine/treatment to the patient situation                             | No  | Information needs for healthcare   CDS context               | Mixed              | Three countries |               |
| Finland | Tampere 1 | Patient | Advice to the right person and professional group that cares for the patient e.g. a physiotherapist needs more information about exercise              | No  | Information needs for healthcare   CDS context               | Mixed              | Three countries |               |
| Finland | Tampere 2 | Patient | Use CDS in all healthcare settings (Primary care, Occupational health care...)                                                                         | Yes | Information needs for healthcare   CDS context               | Mixed              | Three countries |               |
| Norway  | Oslo 1    | Patient | CDS could also provide advice on referring to other healthcare professionals                                                                           | Yes | Interaction with other healthcare professionals              | CDS context        | Patients        | One country   |
| Belgium | Leuven 2  | Patient | The physician makes the decisions because the patient lacks knowledge                                                                                  | No  | Lack of patient involvement                                  | CDS Implementation | Patients        | One country   |
| Belgium | Leuven 1  | Patient | Patients do not always get the possibility to make treatment choices                                                                                   | Yes | Lack of patient involvement                                  | CDS Implementation | Patients        | One country   |
| Norway  | Oslo 1    | Patient | Links could be included to specific organisations and support groups                                                                                   | No  | Making it easy to follow the decision support recommendation | CDS content        | Mixed           | One country   |
| Norway  | Oslo 1    | Patient | Links should be included to practical information sources (for example videos)                                                                         | Yes | Making it easy to follow the decision support recommendation | CDS content        | Mixed           | One country   |
| Norway  | Oslo 2    | GP      | Hyperlinks make it easier for physicians to find information                                                                                           | No  | Making it easy to follow the decision support recommendation | CDS content        | Mixed           | One country   |
| Belgium | Leuven 2  | GP      | Examples illustrating the advantage of using CDS should be clearly communicated                                                                        | No  | Marketing approach                                           | CDS Implementation | GPs             | Two countries |
| Belgium | Leuven 2  | GP      | The use of CDS could be promoted through the patient when they ask if their physician is using such a system                                           | No  | Marketing approach                                           | CDS Implementation | GPs             | Two countries |
| Norway  | Oslo 2    | GP      | The system should be marketed and the best strategy is to demonstrate success through the involvement of superusers or through demonstration in pilots | Yes | Marketing approach                                           | CDS Implementation | GPs             | Two countries |

|         |           |         |                                                                                                                                                                                                    |           |                                                                                                         |             |          |                 |
|---------|-----------|---------|----------------------------------------------------------------------------------------------------------------------------------------------------------------------------------------------------|-----------|---------------------------------------------------------------------------------------------------------|-------------|----------|-----------------|
| Belgium | Leuven 1  | GP      | Decision support should be short during the consultation and long after the consultation                                                                                                           | Yes       | Match with workflow                                                                                     | CDS context | GPs      | Two countries   |
| Norway  | Oslo 2    | GP      | When the patient comes with a new complaint, then the diagnosis is not entered directly in the electronic record and this might be a challenge for good decision support                           | Not clear | Match with workflow                                                                                     | CDS context | GPs      | Two countries   |
| Norway  | Oslo 2    | GP      | It should be possible to continue working when the CDS system sends information                                                                                                                    | Yes       | Match with workflow                                                                                     | CDS context | GPs      | Two countries   |
| Finland | Tampere 1 | Patient | Advice appears automatically in situations when it is needed and right way                                                                                                                         | Yes       | Mode of delivery                                                                                        | CDS system  | Patients | One country     |
| Belgium | Leuven 2  | GP      | It should be possible to receive decision support only on demand                                                                                                                                   | Yes       | Mode of delivery for healthcare professionals                                                           | CDS System  | GPs      | One country     |
| Belgium | Leuven 2  | GP      | The decision support should not be delivered as pop-ups                                                                                                                                            | Yes       | Mode of delivery for healthcare professionals                                                           | CDS System  | GPs      | One country     |
| Belgium | Leuven 1  | GP      | Decision support should be available automatically                                                                                                                                                 | Not clear | Mode of delivery for healthcare professionals                                                           | CDS System  | GPs      | One country     |
| Belgium | Leuven 2  | GP      | More data is needed from patient about what works                                                                                                                                                  | No        | Need for patient data on treatment adherence and effect                                                 | CDS Context | Mixed    | One country     |
| Belgium | Leuven 2  | GP      | Feedback from the patient is needed about adherence to treatment and the effect of the treatment                                                                                                   | No        | Need for patient data on treatment adherence and effect                                                 | CDS Context | Mixed    | One country     |
| Belgium | Leuven 1  | Patient | The physician does not always know which treatment the patient chooses                                                                                                                             | Yes       | Need for patient data on treatment adherence and effect                                                 | CDS Context | Mixed    | One country     |
| Belgium | Leuven 2  | GP      | Decision support should be discussed in person between the clinician and the patient. A risk from CDS is that it replaces this personal contact and that decision making occurs over the computer. | No        | Need for personal discussion about the decision support between the healthcare professional and patient | CDS System  | Mixed    | Three countries |
| Belgium | Leuven 2  | GP      | It is necessary to verify how the patient understood the information and how this relates to other information that the patient received from other sources                                        | No        | Need for personal discussion about the decision support between the healthcare professional and patient | CDS System  | Mixed    | Three countries |

|         |           |         |                                                                                                                                                                                                    |     |                                                                                                         |              |          |                 |
|---------|-----------|---------|----------------------------------------------------------------------------------------------------------------------------------------------------------------------------------------------------|-----|---------------------------------------------------------------------------------------------------------|--------------|----------|-----------------|
| Belgium | Leuven 2  | Patient | Decision support could create anxiety with patients and it is necessary that the clinician can frame the information appropriately                                                                 | Yes | Need for personal discussion about the decision support between the healthcare professional and patient | CDS System   | Mixed    | Three countries |
| Belgium | Leuven 1  | GP      | Preferrably CDS for patients is delivered during the consultation so that the physician can advise the patient in person on the treatment choice based on the decision support information         | Yes | Need for personal discussion about the decision support between the healthcare professional and patient | CDS System   | Mixed    | Three countries |
| Belgium | Leuven 1  | GP      | Information directed at the patient without advise by the physician can lead to inappropriate management                                                                                           | Yes | Need for personal discussion about the decision support between the healthcare professional and patient | CDS System   | Mixed    | Three countries |
| Belgium | Leuven 1  | Patient | Patients could become too focussed or anxious when they receive decision support directly                                                                                                          | No  | Need for personal discussion about the decision support between the healthcare professional and patient | CDS System   | Mixed    | Three countries |
| Norway  | Oslo 1    | Patient | Technology alone is not enough, a lot has to do with the personal contact between the patient and the physician and the physician needs to know the patient his/her perspective                    | Yes | Need for personal discussion about the decision support between the healthcare professional and patient | CDS System   | Mixed    | Three countries |
| Finland | Tampere 2 | Patient | Physicians should assess the CDS and give treatment advice, that is suitable for that patient                                                                                                      | Yes | Need for personal discussion about the decision support between the healthcare professional and patient | CDS System   | Mixed    | Three countries |
| Finland | Tampere 1 | Patient | Obstacles have been considered and if possible also addressed                                                                                                                                      | Yes | Other obstacles and barriers                                                                            | CDS implemer | Patients | One country     |
| Finland | Tampere 2 | Patient | Obstacles and enablers have been assessed                                                                                                                                                          | No  | Other obstacles and barriers                                                                            | CDS implemer | Patients | One country     |
| Belgium | Leuven 1  | GP      | The reason why a patient asks for a consultation is not always clear                                                                                                                               | No  | Patient data about the reason for encounter                                                             | CDS Context  | Mixed    | Two countries   |
| Belgium | Leuven 1  | GP      | Having information before the consultation about the reason for encounter would be useful to prepare the encounter and patients could be invited to communicate this when ordering an consultation | No  | Patient data about the reason for encounter                                                             | CDS Context  | Mixed    | Two countries   |

|         |          |         |                                                                                                                                                                                                                        |     |                                             |             |       |                 |
|---------|----------|---------|------------------------------------------------------------------------------------------------------------------------------------------------------------------------------------------------------------------------|-----|---------------------------------------------|-------------|-------|-----------------|
| Belgium | Leuven 1 | Patient | Not every patient wants to share information about the reason for encounter because of confidentiality of the information                                                                                              | No  | Patient data about the reason for encounter | CDS Context | Mixed | Two countries   |
| Norway  | Oslo 1   | GP      | More information about the agenda for the consult could be collected from the reason for encounter lists                                                                                                               | Yes | Patient data about the reason for encounter | CDS context | Mixed | Two countries   |
| Belgium | Leuven 2 | Patient | Patients want to receive more information about the disease and its management and decision support is very useful for that purpose                                                                                    | No  | Patient information needs and demands       | CDS Context | Mixed | Three countries |
| Belgium | Leuven 2 | GP      | It is an advantage when reliable information can be send to the patient, and now healthcare professionals often have to use time to reassure patients that have read inappropriate information from unreliable sources | No  | Patient information needs and demands       | CDS Context | Mixed | Three countries |
| Belgium | Leuven 2 | GP      | Good information to patients is required for good adherence to the treatment                                                                                                                                           | Yes | Patient information needs and demands       | CDS Context | Mixed | Three countries |
| Belgium | Leuven 1 | Patient | Patients do not get sufficient treatment information. It is especially useful for the patient to get an overview of the treatment options                                                                              | Yes | Patient information needs and der           | CDS Context | Mixed | Three countries |
| Belgium | Leuven 1 | GP      | Not every patient wants to receive information                                                                                                                                                                         | No  | Patient information needs and der           | CDS Context | Mixed | Three countries |
| Belgium | Leuven 1 | GP      | The physician does not alway know if the patient wants additional information                                                                                                                                          | No  | Patient information needs and der           | CDS Context | GPs   | One country     |
| Belgium | Leuven 1 | GP      | Posters and flyers in the waiting room could inform patients that they can ask their physician about patient directed treatment information                                                                            | No  | Patient information needs and der           | CDS Context | GPs   | One country     |
| Norway  | Oslo 1   | Patient | Patients want to have an overview of all the treatment options                                                                                                                                                         | Yes | Patient information needs and der           | CDS Context | Mixed | Three countries |
| Norway  | Oslo 1   | Patient | It would be interesting for patients to receive feedback so that they know if what they do as a patient is good enough                                                                                                 | No  | Patient information needs and der           | CDS Context | Mixed | Three countries |

|         |           |         |                                                                                                                                                                                                           |     |                                                    |                                    |                 |
|---------|-----------|---------|-----------------------------------------------------------------------------------------------------------------------------------------------------------------------------------------------------------|-----|----------------------------------------------------|------------------------------------|-----------------|
| Norway  | Oslo 1    | Patient | More information for patient is needed about how to live with osteoarthritis and electronic information is not enough (for example links to osteoarthritis schools for patients, links to support groups) | No  | Patient information needs and der CDS Context      | Mixed                              | Three countries |
| Norway  | Oslo 2    | Patient | Patients need a place where they can find reliable information                                                                                                                                            | Yes | Patient information needs and der CDS Context      | Mixed                              | Three countries |
| Norway  | Oslo 2    | Patient | Patients need information about the most important information sources                                                                                                                                    | Yes | Patient information needs and der CDS Context      | Mixed                              | Three countries |
| Norway  | Oslo 2    | Patient | It should be clear for patients what makes information reliable                                                                                                                                           | No  | Patient information needs and der CDS Context      | Mixed                              | Three countries |
| Norway  | Oslo 2    | GP      | The physician and the patient often need the same information                                                                                                                                             | Yes | Patient information needs and der CDS Context      | Mixed                              | Three countries |
| Norway  | Oslo 2    | Patient | Information for patients is essential and comes currently often too late                                                                                                                                  | Yes | Patient information needs and demands              | CDS Context<br>Mixed               | Three countries |
| Finland | Tampere 1 | Patient | The information for patients should be enough but not to much either                                                                                                                                      | Yes | Patient information needs and der CDS Context      | Mixed                              | Three countries |
| Belgium | Leuven 2  | Patient | Loosing weight is not easy and other factors than knowledge about recommended lifestyle changes will influence the success                                                                                | No  | Patient motivation and behaviour                   | CDS<br>Implementati<br>on<br>Mixed | Two countries   |
| Norway  | Oslo 1    | Patient | Having knowledge about what to do is very important but other factors that influence if decision support is followed vary among individual patients                                                       | No  | Patient motivation and behaviour                   | CDS<br>Implementati<br>on<br>Mixed | Two countries   |
| Norway  | Oslo 1    | GP      | It is challenging to motivate those patients that are not motivated. Can CDS help to motivate those patients?                                                                                             | Yes | Patient motivation and behaviour                   | CDS<br>Implementati<br>on<br>Mixed | Two countries   |
| Norway  | Oslo 2    | Patient | Physiotherapy may be needed for patients that need to be motivated                                                                                                                                        | Yes | Patient motivation and behaviour                   | CDS<br>Implementati<br>on<br>Mixed | Two countries   |
| Norway  | Oslo 2    | GP      | Healthcare professionals focus on the reason for encounter, while the patient might expect that the physician is also following up on concerns from earlier problems                                      | No  | Patient needs and demands in relation to follow-up | CDS Context<br>GPs<br>Mixed        | One country     |

|         |          |         |                                                                                                                                                                                              |           |                                                                 |             |          |               |
|---------|----------|---------|----------------------------------------------------------------------------------------------------------------------------------------------------------------------------------------------|-----------|-----------------------------------------------------------------|-------------|----------|---------------|
| Belgium | Leuven 2 | GP      | Patients can participate more in the decision making when he is better informed                                                                                                              | Yes       | Patient needs and demands in relation to shared decision making | CDS Context | GPs      | One country   |
| Norway  | Oslo 1   | Patient | Who enters patient data?                                                                                                                                                                     | Not clear | Person responsible for data entry                               | CDS context | Patients | One country   |
| Belgium | Leuven 1 | GP      | It is necessary to have insight in how the decision support is triggered in case you have doubts about the appropriateness of decision support                                               | No        | Reasoning process                                               | CDS Content | GPs      | Two countries |
| Belgium | Leuven 1 | GP      | The decision support should be linked to a diagnosis                                                                                                                                         | No        | Reasoning process                                               | CDS Content | GPs      | Two countries |
| Norway  | Oslo 2   | GP      | CDS is ok for problems that are specific                                                                                                                                                     | No        | Reasoning process                                               | CDS Content | GPs      | Two countries |
| Norway  | Oslo 2   | GP      | Diagnosis and treatment data are the most important elements to trigger relevant CDS                                                                                                         | Yes       | Reasoning process                                               | CDS content | GPs      | Two countries |
| Belgium | Leuven 2 | GP      | After a while you get used to the decision support and the effect of alerts weakens because you do not longer look at it                                                                     | No        | Reduced notice with time                                        | CDS System  | GPs      | One country   |
| Belgium | Leuven 1 | GP      | After a while you will no longer give attention to the information that you have read multiple times before: This includes the risk that you do not notice that new information is available | No        | Reduced notice with time                                        | CDS System  | GPs      | One country   |
| Belgium | Leuven 1 | GP      | After a while you do not longer read the routine information as a physician                                                                                                                  | Yes       | Reduced notice with time                                        | CDS System  | GPs      | One country   |
| Norway  | Oslo 1   | GP      | CDS can direct the topic of the consultation away from the specific reason why the patient asked for a consultation                                                                          | Yes       | Relation between CDS and agenda for the consultation            | CDS content | GPs      | One country   |
| Norway  | Oslo 1   | GP      | Decision support can be disturbing if it is not relevant for the consultation                                                                                                                | Yes       | Relation between CDS and agenda for the consultation            | CDS content | GPs      | One country   |
| Norway  | Oslo 1   | GP      | Irrelevant decision support is disturbing when providing urgent care as a doctor on duty                                                                                                     | No        | Relation between CDS and agenda for the consultation            | CDS content | GPs      | One country   |

|         |          |           |                                                                                                                                                                                              |           |                                                      |                    |       |               |
|---------|----------|-----------|----------------------------------------------------------------------------------------------------------------------------------------------------------------------------------------------|-----------|------------------------------------------------------|--------------------|-------|---------------|
| Norway  | Oslo 1   | GP        | It would be interesting if the physician could indicate at the start of the consultation what is the agenda for the encounter and that decision support information is triggered accordingly | No        | Relation between CDS and agenda for the consultation | CDS content        | GPs   | One country   |
| Norway  | Oslo 2   | GP        | CDS can diverge the focus of the consultation to the topics suggested by the CDS instead of the problem raised by the patient.                                                               | Not clear | Relation between CDS and agenda for the consultation | CDS content        | GPs   | One country   |
| Norway  | Oslo 2   | GP        | Decision support should be relevant for the reason for encounter and this requires that the system is connected to a data field for the diagnosis specific for that day                      | No        | Relation between CDS and agenda for the consultation | CDS content        | GPs   | One country   |
| Belgium | Leuven 2 | GP        | The opinion of the clinician and the patient can be different                                                                                                                                | No        | Role of personal opinions                            | CDS Implementation | Mixed | Two countries |
| Norway  | Oslo 1   | Patient   | Patients can have very strong beliefs and desires about which tests or treatment to receive                                                                                                  | No        | Role of personal opinions                            | CDS Implementation | Mixed | Two countries |
| Norway  | Oslo 2   | Not clear | Patients and physicians can have beliefs and experiences that conflict with the decision support recommendations                                                                             | No        | Role of personal opinions                            | CDS Implementation | Mixed | Two countries |
| Norway  | Oslo 2   | GP        | CDS only becomes interesting if it covers a minimum number of problems                                                                                                                       | Yes       | Scope of the decision support                        | CDS content        | GPs   | One country   |
| Norway  | Oslo 1   | Patient   | Detailed data are important but obtaining a lot of data can be a problem                                                                                                                     | Yes       | Strategies to collect patient data                   | CDS context        | Mixed | One country   |
| Norway  | Oslo 1   | Patient   | Strategies are needed to collect additional data to increase the potential for good decision support                                                                                         | No        | Strategies to collect patient data                   | CDS context        | Mixed | One country   |
| Norway  | Oslo 2   | GP        | Physicians should only be asked to enter additional patient data when this is really important and having a positive impact on the patient outcomes                                          | No        | Strategies to collect patient data                   | CDS context        | Mixed | One country   |
| Belgium | Leuven 2 | GP        | Sufficient technical support is needed                                                                                                                                                       | No        | Technical support                                    | CDS Implementation | GPs   | One country   |

|         |           |         |                                                                                                                                                                                                                                                                        |     |                                                         |                    |          |                 |
|---------|-----------|---------|------------------------------------------------------------------------------------------------------------------------------------------------------------------------------------------------------------------------------------------------------------------------|-----|---------------------------------------------------------|--------------------|----------|-----------------|
| Belgium | Leuven 2  | GP      | It might be impossible for the clinician to read decision support before a consultation                                                                                                                                                                                | No  | Timing of decision support for healthcare professionals | CDS System         | GPs      | One country     |
| Belgium | Leuven 2  | GP      | Presenting the decision support during the consultation is most effective                                                                                                                                                                                              | No  | Timing of decision support for healthcare professionals | CDS System         | GPs      | One country     |
| Belgium | Leuven 1  | GP      | When the reason for encounter is known, the decision support can be read before the consult.                                                                                                                                                                           | No  | Timing of decision support for healthcare professionals | CDS System         | GPs      | One country     |
| Belgium | Leuven 2  | Patient | Patients could receive information when making an appointment and this might motivate them to indicate the reason for their encounter                                                                                                                                  | Yes | Timing of decision support for patients                 | CDS System         | Patients | Three countries |
| Belgium | Leuven 1  | Patient | It would be interesting for patients if they could have information available independently from a consultation. This makes it possible for patients to prepare themselves for a consultation with specific questions about treatment options that might apply to them | No  | Timing of decision support for patients                 | CDS System         | Patients | Three countries |
| Norway  | Oslo 2    | Patient | Patients need direct access to decision support so that they can prepare themselves for a consultation and therefore they need decision support information that is available before the encounter                                                                     | Yes | Timing of decision support for patients                 | CDS system         | Patients | Three countries |
| Finland | Tampere 1 | Patient | CDS should come at the right moment                                                                                                                                                                                                                                    | Yes | Timing of decision support for patients                 | CDS system         | Patients | Three countries |
| Finland | Tampere 2 | Patient | The system should work on the right moment                                                                                                                                                                                                                             | Yes | Timing of decision support for patients                 | CDS system         | Patients | Three countries |
| Belgium | Leuven 2  | GP      | CDS needs to be intuitive, but training is always required                                                                                                                                                                                                             | Yes | Training about CDS for healthcare professionals         | CDS Implementation | Mixed    | Two countries   |
| Belgium | Leuven 1  | GP      | Training is needed for the clinician to provide further background to CDS and to demonstrate how it functions                                                                                                                                                          | Yes | Training about CDS for healthcare professionals         | CDS Implementation | Mixed    | Two countries   |
| Norway  | Oslo 1    | Patient | CDS should be so intuitive so that it does not require any user training                                                                                                                                                                                               | No  | Training about CDS for healthcare professionals         | CDS Implementation | Mixed    | Two countries   |
| Belgium | Leuven 2  | GP      | Decision support should be based on the most recent knowledge                                                                                                                                                                                                          | No  | Up to date information                                  | CDS Content        | Mixed    | Two countries   |



|         |           |         |                                                                                                                                           |     |                               |             |       |               |
|---------|-----------|---------|-------------------------------------------------------------------------------------------------------------------------------------------|-----|-------------------------------|-------------|-------|---------------|
| Finland | Tampere 2 | Patient | Updated advice (updated guidelines)                                                                                                       | No  | Up to date information        | CDS content | Mixed | Two countries |
| Norway  | Oslo 1    | GP      | If CDS is userfriendly then it might fit with the time limitations, there is no time to search for information during a patient encounter | Yes | Usability under time pressure | CDS system  | GPs   | Two countries |
| Norway  | Oslo 2    | GP      | Time limitations is a challenge and it is important that CDS is well integrated                                                           | No  | Usability under time pressure | CDS system  | GPs   | Two countries |
| Norway  | Oslo 2    | GP      | The system should work fast and work with minimal data traffic                                                                            | No  | Usability under time pressure | CDS system  | GPs   | Two countries |
| Belgium | Leuven 2  | GP      | Visual aspects of how the information is presented should be considered                                                                   | Yes | Visual style                  | CDS System  | GPs   | Two countries |
| Norway  | Oslo 1    | GP      | CDS should be intuitive, with less text and more illustrations                                                                            | Yes | Visual style                  | CDS system  | GPs   | Two countries |
| Norway  | Oslo 1    | GP      | Differentiate in the presentation of content                                                                                              | Yes | Visual style                  | CDS system  | GPs   | Two countries |
